# Supplementary material for: Greenstone burial–exhumation cycles at the late Archean transition to plate tectonics
Source: PubMed Central journal article supplement (PMC9780361; doi:10.1038/s41467-022-35208-2), 2022-12-22
Supplement: 41467_2022_35208_MOESM3_ESM.pdf [file 41467_2022_35208_MOESM3_ESM.pdf]

- 1 Supplementary Data 2. Whole-rock major and trace element compositions of amphibolite from  
2 the WGB.
- 3
- 4 Supplementary Data 3. Whole-rock major and trace element compositions of basalts from the  
5 Yilgarn Craton.
- 6
- 7 Supplementary Data 4. Laser ablation inductively coupled plasma mass spectrometry (LA-ICP-  
8 MS) trace element analyses of garnet.
- 9
- 10 Supplementary Data 5. LA-ICP-MS trace element analyses of hornblende.
- 11
- 12 Supplementary Data 6. Representative bulk rock composition of BIF from the WGB, and from  
13 the rest of the Youanmi Terrane (Yilgarn Craton).
- 14
- 15 Supplementary Data 7. EPMA measurements of garnets.
- 16
- 17 Supplementary Data 8. LA-ICP-MS trace element analyses of garnets.
- 18
- 19 Supplementary Data 9. Raw  $^{18}\text{O}/^{16}\text{O}$  ratios and the corrected  $\delta^{18}\text{O}$  values of SIMS analyses  
20 in garnet (quoted with respect to Vienna Standard Mean Ocean Water, or VSMOW, in per mil).
- 21
- 22 Supplementary Data 10. Ion microprobe U-Th-Pb analyses of monazite and zircon.
- 23
- 24 Supplementary Data 11. Sm-Nd and Lu-Hf isotope data.
- 25
- 26 Supplementary Data 12. Representative mineral compositions for sample 219364.
- 27
- 28 Supplementary Data 13. Compositions used in phase equilibria modelling for sample 219364
